# Supplementary material for: Heterozygous mutations in SOX2 may cause idiopathic hypogonadotropic hypogonadism via dominant-negative mechanisms
Source: PubMed Central journal article supplement (PMC9977424; doi:10.1172/jci.insight.164324), 2023-02-08
Supplement: jciinsight-8-164324-s033.pdf [file jciinsight-8-164324-s033.pdf]

**Supplementary Table 1: SOX2 variants identified in IHH cases**

| Case | SOX2 variant | Variant type | Inheritance          | ACMG classification criteria | ACMG classification |
|------|--------------|--------------|----------------------|------------------------------|---------------------|
| 1    | p.D123Vfs*31 | frameshift   | <i>De novo</i>       | PVS1, PS2, PM1, PM2, PP4     | Pathogenic          |
| 2    | p.Y200*      | nonsense     | <i>De novo</i>       | PVS1, PS2, PM1, PM2, PP4     | Pathogenic          |
| 3    | p.R43L       | missense     | Unknown              | PM1, PM2, PP2, PP3, PP4      | Likely pathogenic   |
| 4    | p.A99G       | missense     | Maternally inherited | PM1, PP2, PP3, PP4           | VUS                 |
| 5    | p.H101D      | missense     | <i>De novo</i>       | PS2, PM1, PM2, PP2, PP3, PP4 | Pathogenic          |
| 6    | p.A191V      | missense     | Unknown              | PM1, PM2, PP2, PP4           | Likely pathogenic   |
| 7    | p.S250T      | missense     | Unknown              | PM1, PM2, PP2, PP4           | Likely pathogenic   |
| 8    | p.P284R      | missense     | Unknown              | PM1, PM2, PP2, PP4           | Likely pathogenic   |

**Supplementary Table 2: *In silico* analysis of SOX2 missense variants**

| Position | Change  | Chromosomal location | Chromosomal location (hg19) | CADD | SIFT        | PROVEAN PREDICTION | Polyphen 2        |
|----------|---------|----------------------|-----------------------------|------|-------------|--------------------|-------------------|
| c.128G>T | p.R43L  | 181712488            | 181430276                   | 27.4 | Deleterious | Deleterious        | Probably damaging |
| c.296C>G | p.A99G  | 181712656            | 181430444                   | 33   | Deleterious | Deleterious        | Possibly damaging |
| c.301C>G | p.H101D | 181712661            | 181430449                   | 33   | Deleterious | Deleterious        | Probably damaging |
| c.572C>T | p.A191V | 181712932            | 181430720                   | 23.4 | Tolerated   | Neutral            | Benign            |
| c.748T>A | p.S250T | 181713108            | 181430896                   | 23.4 | Tolerated   | Neutral            | Benign            |
| c.851C>G | p.P284R | 181713211            | 181430999                   | 22.2 | Tolerated   | Neutral            | Benign            |

**Supplemental Table 3. Primers used for Q5 mutagenesis**

| Mutation | Forward primer sequence     |
|----------|-----------------------------|
| p.R43L   | 5'-CGCGTCAAGctGCCCATGAAT-3' |
| p.A99G   | 5'-CGGCTGCGAGgGCTGCACATG-3' |
| p.H101D  | 5'-GCGAGCGCTgACATGAAGGAG-3' |
| p.D123V  | 5'-TAAGTACACGCTGCCCGG-3'    |
| p.A191V  | 5'-GCGCACGGCGtAGCGCAGATG-3' |
| p.Y200X  | 5'-TGCACCGCTAaGACGTGAGCG-3' |
| p.S250T  | 5'-CGAGGCCAGCaCCAGCCCCC-3'  |
| p.P284R  | 5'-GCCGAGGTGCgGGAACCCGCC-3' |

**Supplemental Table 4. Antibodies**

| Antigen | Experiment | Concentration | Catalog number | Lot number        |
|---------|------------|---------------|----------------|-------------------|
| SOX2    | IF         | 1:1000        | ab97959        | GR3386111-1       |
| HA      | IF         | 1:1000        | C29F4          | 9                 |
| GFP-488 | IF         | 1:1000        | A21311         | 2207528           |
| Rb-594  | IF         | 1:1000        | A11012         | 1933366           |
| Rb-488  | IF         | 1:1000        | A11034         | 2379999           |
| HA      | Western    | 1:500         | C29F4          | 9                 |
| GFP     | Western    | 1:5000        | MA5-15256      | UA277185/VD299006 |
| Actin   | Western    | 1:50000       | Ab49900        | GR276781-11       |
| Rb-HRP  | Western    | 1:5000        | 7074S          | 30                |
| Ms-HRP  | Western    | 1:10000       | 7076S          | 36                |

**Supplemental Table 5.** Oligonucleotides used for DNA precipitation

| Oligonucleotide Forward | Sequence                               |
|-------------------------|----------------------------------------|
| SOX2 Consensus Multimer | 5'-CCTTTGTTCTTTGTTCTTTGTTCTTTGTT-3'    |
| Scramble Multimer       | 5'-ACGTACGTACGTACGTACGTACGTACGTACGT-3' |
| Kiss1 -262              | 5'-CCTGCCCCAAACAACGTGGAAATGGGCTA-3'    |
| Kiss1 -319              | 5'-GTGTGAAATGTCTTGTTTCCTCTCCGAAGA-3'   |
| Kiss1 -772              | 5'-GGCCCCACCTTCTTGTCTCGTGGCACCCAC-3'   |
| Kiss1 -802              | 5'-CCACCATACTATTTTGTGACTGCTCAGTAC-3'   |
| Kiss1 -943              | 5'-CATCGCAGGTGACTTTTGTCTCTTTCTTGA-3'   |
| Kiss1 -985              | 5'-ATACCCTTGGACAAGGGGCTCTCCAGGGCA-3'   |
| Kiss1 -1085             | 5'-CTCTCCCAGCACAAAGCTCAACCTGGTCGTC-3'  |
| Kiss1 -1155             | 5'-GCACCCTCACTTGTCTGATGCTTACTGTT-3'    |

**Supplemental Table 6.** Primers used for qPCR

| Primer  | Sequence                   |
|---------|----------------------------|
| SOX2 F  | 5'-AAGGGTTCTTGCTGGGTTTT-3' |
| SOX2 R  | 5'-AGACCACGAAAACGGTCTTG-3' |
| H2AFZ F | 5'-TCACCGCAGAGGTACTTGAG-3' |
| H2AFZ R | 5'-GATGTGTGGGATGACACCA-3'  |
